# Supplementary material for: Restorative Effect of Microalgae Nannochloropsis oceanica Lipid Extract on Phospholipid Metabolism in Keratinocytes Exposed to UVB Radiation
Source: MDPI journal article supplement (doi:10.3390/ijms241814323), 2023-09-20
Supplement: s1 [file s1]

Supplementary Table S1

Polar lipid composition of the lipid extracts of *Nannochloropsis oceanica* identified by HILIC-ESI-MS and HILIC-ESI-MS/MS in positive ion mode, as [M+H]<sup>+</sup> and [M+NH<sub>4</sub>]<sup>+</sup> ions, and in negative ion mode, as [M-H]<sup>-</sup>. When the fatty acyl chain combination was not possible to assign the lines were filled with "-".

| Lipid species (C:N)                 | Calculated<br><i>m/z</i> | Fatty acyl<br>chains (C:N) | Lipid species (C:N)                 | Calculated<br><i>m/z</i> | Fatty acyl<br>chains (C:N) |
|-------------------------------------|--------------------------|----------------------------|-------------------------------------|--------------------------|----------------------------|
| PC identified as [M+H] <sup>+</sup> |                          |                            | PC identified as [M+H] <sup>+</sup> |                          |                            |
| PC(28:1)                            | 676,4917                 | -                          | PC(34:3)                            | 756,5543                 | 18:2-16:1                  |
| PC(30:3)                            | 700,4917                 | -                          | PC(34:2)                            | 758,57                   | 18:1-16:1                  |
| PC(30:1)                            | 704,523                  | 16:1-14:0                  |                                     |                          | 18:2-16:0                  |
| PC(31:2)                            | 716,523                  | 16:1-15:1                  | PC(34:1)                            | 760,5856                 | 18:1-16:0                  |
| PC(31:1)                            | 718,5387                 | 16:1-15:0                  |                                     |                          | 16:1-18:0                  |
|                                     |                          | 17:1-14:0                  | PC(35:4)                            | 768,5543                 | -                          |
|                                     |                          | 15:1-16:0                  | PC(35:3)                            | 770,57                   | -                          |
| PC(32:5)                            | 724,4917                 | -                          | PC(35:2)                            | 772,5856                 | -                          |
| PC(32:4)                            | 726,5074                 | 16:3-16:1                  | PC(35:1)                            | 774,6013                 | 16:1-17:0                  |
|                                     |                          | 16:2/16:2                  | PC(37:7)                            | 790,5387                 | 17:2-20:5                  |
| PC(32:3)                            | 728,523                  | 16:2-16:1                  | PC(37:6)                            | 792,5543                 | 21:5-16:1                  |
|                                     |                          | 16:3-16:0                  |                                     |                          | 17:1-20:5                  |
|                                     |                          | 18:3-14:0                  |                                     |                          | 17:2-20:4                  |
| PC(32:2)                            | 730,5387                 | 16:1/16:1                  | PC(36:8)                            | 774,5074                 | -                          |
|                                     |                          | 16:2-16:0                  | PC(36:7)                            | 776,523                  | 16:2-20:5                  |
|                                     |                          | 18:2-14:0                  | PC(36:6)                            | 778,5387                 | 16:1-20:5                  |
| PC(32:1)                            | 732,5543                 | -                          |                                     |                          | 16:2-20:4                  |
| PC(33:3)                            | 742,5387                 | 17:2-16:1                  | PC(36:5)                            | 780,5543                 | 16:1-20:4                  |
|                                     |                          | 17:1-16:2                  |                                     |                          | 16:0-20:5                  |
|                                     |                          | 15:0-18:3                  | PC(36:4)                            | 782,57                   | 18:2-18:2                  |
| PC(33:2)                            | 744,5543                 | 18:2-15:0                  |                                     |                          | 20:3-16:1                  |
|                                     |                          | 17:1-16:1                  |                                     |                          | 20:4-16:0                  |
|                                     |                          | 17:2-16:0                  | PC(36:3)                            | 784,5856                 | 20:3-16:0                  |
| PC(34:7)                            | 748,4917                 | -                          |                                     |                          | 16:1-20:2                  |
| PC(34:6)                            | 750,5074                 | 16:1-18:5                  |                                     |                          | 18:2-18:1                  |
| PC(34:5)                            | 752,523                  | 18:3-16:2                  | PC(36:2)                            | 786,6013                 | 18:1-18:1                  |
|                                     |                          | 18:4-16:1                  |                                     |                          | 20:2-16:0                  |
|                                     |                          | 14:0-20:5                  |                                     |                          | 18:2-18:0                  |
|                                     |                          | 18:2-16:3                  |                                     |                          | 20:1-16:1                  |
| PC(34:4)                            | 754,5387                 | 20:4-14:0                  | PC(38:8)                            | 802,5387                 | 18:3-20:5                  |
|                                     |                          | 16:1-18:3                  | PC(38:7)                            | 804,5543                 | 18:2-20:5                  |
|                                     |                          | 18:4-16:0                  |                                     |                          | 18:3-20:4                  |
|                                     |                          | 18:2-16:2                  |                                     |                          |                            |
|                                     |                          | 18:1-16:3                  |                                     |                          |                            |

| Lipid species (C:N)                       | Calculated<br>m/z | Fatty acyl<br>chains (C:N)          |
|-------------------------------------------|-------------------|-------------------------------------|
| <b>PC identified as [M+H]<sup>+</sup></b> |                   |                                     |
| PC(38:6)                                  | 806,57            | 18:2-20:4<br>18:1-20:5<br>20:3-18:3 |
| PC(38:5)                                  | 808,5856          | 20:4-18:1                           |
| PC(38:3)                                  | 812,6169          | -                                   |
| PC(38:2)                                  | 814,6326          | 18:2-20:0                           |
| PC(38:1)                                  | 816,6482          | -                                   |
| PC(40:11)                                 | 824,523           | -                                   |
| PC(40:10)                                 | 826,5387          | 20:5/20:5                           |
| PC(40:9)                                  | 828,5543          | 20:5-20:4                           |
| PC(40:8)                                  | 830,57            | -                                   |
| PC(40:5)                                  | 836,6169          | -                                   |

| Lipid species (C:N)                        | Calculated<br>m/z | Fatty acyl<br>chains (C:N) |
|--------------------------------------------|-------------------|----------------------------|
| <b>LPC identified as [M+H]<sup>+</sup></b> |                   |                            |
| LPC(14:0)                                  | 468,309           | 14:0                       |
| LPC(16:3)                                  | 490,2934          | 16:3                       |
| LPC(16:2)                                  | 492,309           | 16:2                       |
| LPC(16:1)                                  | 494,3247          | 16:1                       |
| LPC(16:0)                                  | 496,3403          | 16:0                       |
| LPC(17:0)                                  | 510,356           | 17:0                       |
| LPC(17:1)                                  | 508,3403          | 17:1                       |
| LPC(17:2)                                  | 506,3247          | 17:2                       |
| LPC(18:5)                                  | 514,2934          | -                          |
| LPC(18:4)                                  | 516,309           | 18:4                       |
| LPC(18:3)                                  | 518,3247          | 18:3                       |
| LPC(18:2)                                  | 520,3403          | 18:2                       |
| LPC(18:1)                                  | 522,356           | 18:1                       |
| LPC(20:5)                                  | 542,3247          | 20:5                       |
| LPC(20:4)                                  | 544,3403          | 20:4                       |
| LPC(20:3)                                  | 546,356           | -                          |
| LPC(20:1)                                  | 550,3873          | -                          |
| LPC(20:0)                                  | 552,4029          | 20:0                       |
| LPC(22:6)                                  | 568,3403          | -                          |
| LPC(22:5)                                  | 570,356           | -                          |

| Lipid species (C:N)                       | Calculated<br>m/z | Fatty acyl<br>chains (C:N)          |
|-------------------------------------------|-------------------|-------------------------------------|
| <b>PE identified as [M+H]<sup>+</sup></b> |                   |                                     |
| PE(30:3)                                  | 658,4448          | -                                   |
| PE(30:1)                                  | 662,4761          | 14:0-16:1<br>15:1-15:0              |
| PE(30:0)                                  | 664,4917          | 14:0-16:0<br>15:0/15:0              |
| PE(32:4)                                  | 684,4604          | -                                   |
| PE(32:3)                                  | 686,4761          | 16:2-16:1                           |
| PE(32:2)                                  | 688,4917          | 16:1/16:1<br>16:2-16:0              |
| PE(32:1)                                  | 690,5074          | -                                   |
| PE(34:6)                                  | 708,4604          | -                                   |
| PE(34:5)                                  | 710,4761          | -                                   |
| PE(34:4)                                  | 712,4917          | 18:3-16:1<br>14:0-20:4              |
| PE(34:3)                                  | 714,5074          | 18:2-16:1<br>20:3-14:0              |
| PE(34:2)                                  | 716,523           | 16:1-18:1                           |
| PE(36:8)                                  | 732,4604          | -                                   |
| PE(36:7)                                  | 734,4761          | -                                   |
| PE(36:6)                                  | 736,4917          | 16:1-20:5<br>16:2-20:4              |
| PE(36:5)                                  | 738,5074          | 16:1-20:4                           |
| PE(36:4)                                  | 740,523           | 20:3-16:1<br>20:4-16:0              |
| PE(36:3)                                  | 742,5387          | -                                   |
| PE(36:2)                                  | 744,5543          | 18:1/18:1                           |
| PE(38:9)                                  | 758,4761          | -                                   |
| PE(38:8)                                  | 760,4917          | 18:4-20:4                           |
| PE(38:7)                                  | 762,5074          | 18:3-20:4<br>20:3-18:4<br>18:2-20:5 |
| PE(38:6)                                  | 764,523           | 18:2-20:4                           |
| PE(38:5)                                  | 766,5387          | 18:1-20:4                           |
| PE(40:10)                                 | 784,4917          | 20:5/20:5                           |
| PE(40:9)                                  | 786,5074          | 20:4-20:5                           |
| PE(40:8)                                  | 788,523           | 20:4-20:4                           |
| PE(40:7)                                  | 790,5387          | 20:3-20:4<br>20:5-20:2              |

| Lipid species (C:N)                  | Calculated<br><i>m/z</i> | Fatty acyl<br>chains (C:N) |
|--------------------------------------|--------------------------|----------------------------|
| LPE identified as [M+H] <sup>+</sup> |                          |                            |
| LPE(14:0)                            | 426,2621                 | 14:0                       |
| LPE(16:3)                            | 448,2464                 | -                          |
| LPE(16:2)                            | 450,2621                 | 16:2                       |
| LPE(16:1)                            | 452,2777                 | 16:1                       |
| LPE(16:0)                            | 454,2934                 | -                          |
| LPE(18:4)                            | 474,2621                 | 18:4                       |
| LPE(18:3)                            | 476,2777                 | 18:3                       |
| LPE(18:2)                            | 478,2934                 | 18:2                       |
| LPE(18:1)                            | 480,309                  | 18:1                       |
| LPE(20:5)                            | 500,2777                 | 20:5                       |
| LPE(20:4)                            | 502,2934                 | 20:4                       |
| LPE(20:3)                            | 504,309                  | -                          |
| LPE(20:2)                            | 506,3247                 | -                          |

| Lipid species (C:N)                 | Calculated<br><i>m/z</i> | Fatty acyl<br>chains (C:N) |
|-------------------------------------|--------------------------|----------------------------|
| PG identified as [M-H] <sup>-</sup> |                          |                            |
| PG(30:1)                            | 691,455                  | 14:0-16:1                  |
| PG(31:0)                            | 707,4863                 | 15:0-16:0                  |
| PG(31:1)                            | 705,4707                 | 15:0-16:1                  |
|                                     |                          | 15:1-16:0                  |
| PG(32:1)                            | 719,4863                 | 16:0-16:1                  |
|                                     |                          | 14:0-18:1                  |
| PG(32:2)                            | 717,4707                 | 16:1/16:1                  |
|                                     |                          | 16:0-16:2                  |
| PG(33:1)                            | 733,502                  | 16:1-17:0                  |
| PG(34:1)                            | 747,5176                 | 16:0-18:1                  |
| PG(34:2)                            | 745,502                  | 16:0-18:2                  |
|                                     |                          | 16:1-18:1                  |
| PG(34:5)                            | 739,455                  | 14:0-20:5                  |
| PG(35:5)                            | 753,4707                 | 15:0-20:5                  |
| PG(36:2)                            | 773,5333                 | -                          |
| PG(36:5)                            | 767,4863                 | 16:0-20:5                  |
|                                     |                          | 16:1-20:4                  |
| PG(36:5(OH))                        | 783,4812                 | (16:0-OH)-<br>20:5         |
| PG(36:6)                            | 765,4707                 | 20:5-16:1                  |

| Lipid species (C:N)                  | Calculated<br><i>m/z</i> | Fatty acyl<br>chains (C:N) |
|--------------------------------------|--------------------------|----------------------------|
| LPG identified as [M-H] <sup>-</sup> |                          |                            |
| LPG(16:0)                            | 483,2723                 | 16:0                       |

| Lipid species (C:N)                 | Calculated<br><i>m/z</i> | Fatty acyl<br>chains (C:N) |
|-------------------------------------|--------------------------|----------------------------|
| PI identified as [M-H] <sup>-</sup> |                          |                            |
| PI(28:0)                            | 753,4554                 | 14:0/14:0                  |
| PI(30:1)                            | 779,4711                 | 16:1-14:0                  |
| PI(32:1)                            | 807,5024                 | 16:1-16:0                  |
|                                     | 807,5024                 | 18:1-14:0                  |
| PI(32:2)                            | 805,4867                 | 16:1/16:1                  |
|                                     | 805,4867                 | 16:0-16:2                  |
|                                     | 805,4867                 | 18:2-14:0                  |
| PI(33:1)                            | 821,518                  | 16:1-17:0                  |
|                                     | 821,518                  | 16:0-17:1                  |
| PI(34:1)                            | 835,5337                 | 18:1-16:0                  |
|                                     | 835,5337                 | 16:1-18:0                  |
| PI(34:2)                            | 833,518                  | 18:2-16:0                  |
|                                     | 833,518                  | 16:1-18:1                  |
| PI(34:3)                            | 831,5024                 | 18:2-16:1                  |
|                                     | 831,5024                 | 16:2-18:1                  |
| PI(34:5)                            | 827,4711                 | 14:0-20:5                  |
| PI(36:6)                            | 853,4867                 | 20:5-16:1                  |
| PI(40:10)                           | 901,4867                 | 20:5/20:5                  |

| Lipid species (C:N)                   | Calculated<br><i>m/z</i> | Fatty acyl<br>chains (C:N) |
|---------------------------------------|--------------------------|----------------------------|
| MGTS identified as [M+H] <sup>+</sup> |                          |                            |
| MGTS(14:1)                            | 444,3325                 | 14:1                       |
| MGTS(14:0)                            | 446,3482                 | 14:0                       |
| MGTS(15:0)                            | 460,3638                 | 15:0                       |
| MGTS(16:4)                            | 466,3169                 | 16:4                       |
| MGTS(16:3)                            | 468,3325                 | 16:3                       |
| MGTS(16:2)                            | 470,3482                 | -                          |
| MGTS(16:1)                            | 472,3638                 | 16:1                       |
| MGTS(16:0)                            | 474,3795                 | -                          |
| MGTS (17:1)                           | 486,3795                 | 17:1                       |
| MGTS (17:2)                           | 484,3638                 | 17:2                       |
| MGTS(18:5)                            | 492,3325                 | 18:5                       |
| MGTS(18:4)                            | 494,3482                 | 18:4                       |
| MGTS(18:3)                            | 496,3638                 | 18:3                       |
| MGTS(18:2)                            | 498,3795                 | 18:2                       |
| MGTS(18:1)                            | 500,3951                 | 18:1                       |
| MGTS(20:5)                            | 520,3638                 | 20:5                       |
| MGTS(20:4)                            | 522,3795                 | -                          |

| Lipid species (C:N)                   | Calculated<br><i>m/z</i> | Fatty acyl<br>chains (C:N)          |
|---------------------------------------|--------------------------|-------------------------------------|
| DGTS identified as [M+H] <sup>+</sup> |                          |                                     |
| DGTS(28:1)                            | 654,5309                 | 16:1-12:0<br>14:1-14:0              |
| DGTS(28:0)                            | 656,5465                 | 14:0/14:0<br>12:0-16:0              |
| DGTS(30:3)                            | 678,5309                 | 16:3-14:0                           |
| DGTS(30:2)                            | 680,5465                 | 16:2-14:0<br>16:1-14:1              |
| DGTS(30:1)                            | 682,5622                 | 16:1-14:0                           |
| DGTS(32:5)                            | 702,5309                 | 20:5-12:0                           |
| DGTS(32:4)                            | 704,5465                 | 18:4-14:0                           |
| DGTS(32:3)                            | 706,5622                 | -                                   |
| DGTS(32:2)                            | 708,5778                 | 16:1/16:1<br>18:2-14:0<br>16:2-16:0 |
| DGTS(32:1)                            | 710,5935                 | 16:1-16:0<br>18:1-14:0              |
| DGTS(33:2)                            | 722,5935                 | 17:1-16:1<br>18:2-15:0<br>17:2-16:0 |
| DGTS(34:6)                            | 728,5465                 | 20:5-14:1                           |
| DGTS(34:5)                            | 730,5622                 | 20:5-14:0                           |
| DGTS(34:4)                            | 732,5778                 | 20:4-14:0                           |
| DGTS(34:3)                            | 734,5935                 | 20:3-14:0<br>16:1-18:2<br>18:3-16:0 |
| DGTS(34:2)                            | 736,6091                 | 18:2-16:0<br>18:1-16:1<br>20:2-14:0 |
| DGTS(34:1)                            | 738,6248                 | 20:1-14:0<br>16:0-18:1              |
| DGTS(36:7)                            | 754,5622                 | 16:2-20:5                           |
| DGTS(36:6)                            | 756,5778                 | 16:1-20:5                           |
| DGTS(36:5)                            | 758,5935                 | 20:5-16:0                           |
| DGTS(36:4)                            | 760,6091                 | -                                   |
| DGTS(36:3)                            | 762,6248                 | 20:3-16:0<br>20:2-16:1<br>18:2-18:1 |
| DGTS(36:2)                            | 764,6404                 | -                                   |
| DGTS (37:5)                           | 772,6091                 | 20:5-17:0<br>20:4-17:1              |
| DGTS(38:10)                           | 776,5465                 | 18:5-20:5                           |
| DGTS(38:9)                            | 778,5622                 | 18:4-20:5                           |
| DGTS(38:8)                            | 780,5778                 | -                                   |

| Lipid species (C:N)                                  | Calculated<br><i>m/z</i> | Fatty acyl<br>chains (C:N) |
|------------------------------------------------------|--------------------------|----------------------------|
| DGTS identified as [M+H] <sup>+</sup>                |                          |                            |
| DGTS(38:7)                                           | 782,5935                 | 20:5-18:2<br>18:3-20:4     |
| DGTS(38:6)                                           | 784,6091                 | -                          |
| DGTS(38:5)                                           | 786,6248                 | 20:4-18:1<br>20:5-18:0     |
| DGTS(40:10)                                          | 804,5778                 | 20:5/20:5                  |
| DGTS(40:9)                                           | 806,5935                 | -                          |
| SQDG identified as [M-H] <sup>-</sup>                |                          |                            |
| SQDG(28:0)                                           | 737,451                  | 14:0/14:0                  |
| SQDG(30:0)                                           | 765,4823                 | 16:0-14:0                  |
| SQDG(30:1)                                           | 763,4666                 | 16:1-14:0                  |
| SQDG(31:1)                                           | 777,4823                 | 15:0-16:1                  |
| SQDG(32:1)                                           | 791,4979                 | -                          |
| SQDG(32:2)                                           | 789,4823                 | 16:1/16:1                  |
| SQDG(32:3)                                           | 787,4666                 | -                          |
| SQDG(34:1)                                           | 819,5292                 | 16:0-18:1                  |
| SQDG(34:2)                                           | 817,5136                 | 16:0-18:2                  |
| SQDG(36:5)                                           | 839,4979                 | -                          |
| MGDG identified as [M+NH <sub>4</sub> ] <sup>+</sup> |                          |                            |
| MGDG(30:1)                                           | 718,5464                 | -                          |
| MGDG(32:5)                                           | 738,5156                 | -                          |
| MGDG(32:2)                                           | 744,5626                 | -                          |
| MGDG(32:1)                                           | 746,5777                 | -                          |
| MGDG(34:5)                                           | 766,5469                 | 14:0-20:5<br>16:1-18:4     |
| MGDG(34:2)                                           | 772,5933                 | -                          |
| MGDG(34:1)                                           | 774,609                  | -                          |
| MGDG(36:6)                                           | 792,5625                 | 16:1-20:5                  |
| MGDG(36:5)                                           | 794,5782                 | -                          |
| MGDG(38:7)                                           | 818,5782                 | -                          |
| MGDG(40:10)                                          | 840,5626                 | -                          |
| MGDG(40:9)                                           | 842,5782                 | -                          |
| MGDG(40:8)                                           | 844,5939                 | -                          |

| Lipid species (C:N)                                      | Calculated<br><i>m/z</i> | Fatty acyl<br>chains (C:N)          |
|----------------------------------------------------------|--------------------------|-------------------------------------|
| <b>DGDG identified as [M+NH<sub>4</sub>]<sup>+</sup></b> |                          |                                     |
| DGDG(30:1)                                               | 880,5997                 | 14:0-16:1                           |
| DGDG(30:0)                                               | 882,6154                 | -                                   |
| DGDG(32:5)                                               | 900,5684                 | -                                   |
| DGDG(32:3)                                               | 904,5997                 | -                                   |
| DGDG(32:2)                                               | 906,6154                 | 16:1/16:1<br>14:0-18:2<br>16:0-16:2 |
| DGDG(32:1)                                               | 908,631                  | 16:0-16:1<br>-                      |
| DGDG(34:5)                                               | 928,5997                 | 14:0-20:5                           |
| DGDG(34:3)                                               | 932,631                  | -                                   |
| DGDG(34:2)                                               | 934,6467                 | -                                   |
| DGDG(34:1)                                               | 936,6623                 | -                                   |
| DGDG(35:5)                                               | 942,6154                 | 15:0-20:5                           |
| DGDG(36:7)                                               | 952,5997                 | -                                   |
| DGDG(36:6)                                               | 954,6154                 | 16:1-20:5                           |
| DGDG(36:5)                                               | 956,631                  | -                                   |
| DGDG(38:7)                                               | 980,631                  | 18:2-20:5                           |
| DGDG(38:6)                                               | 982,6467                 | -                                   |
| DGDG(40:10)                                              | 1002,6154                | 20:5/20:5                           |

| Lipid species (C:N)                                      | Calculated<br><i>m/z</i> | Fatty acyl<br>chains (C:N) |
|----------------------------------------------------------|--------------------------|----------------------------|
| <b>MGMG identified as [M+NH<sub>4</sub>]<sup>+</sup></b> |                          |                            |
| MGMG(16:0)                                               | 510,3642                 | -                          |

| Lipid species (C:N)                                      | Calculated<br><i>m/z</i> | Fatty acyl<br>chains (C:N) |
|----------------------------------------------------------|--------------------------|----------------------------|
| <b>DGMG identified as [M+NH<sub>4</sub>]<sup>+</sup></b> |                          |                            |
| DGMG(14:0)                                               | 644,3857                 | -                          |
| DGMG(16:1)                                               | 670,4014                 | -                          |
| DGMG(16:0)                                               | 672,417                  | 16:0                       |
| DGMG(20:5)                                               | 718,4014                 | -                          |

| Lipid species (C:N)                           | Calculated<br><i>m/z</i> | Fatty acyl<br>chains (C:N) |
|-----------------------------------------------|--------------------------|----------------------------|
| <b>Cer identified as [M+H]<sup>+</sup></b>    |                          |                            |
| Cer(d32:2)                                    | 508,473                  | d18:1/14:1                 |
| Cer(d32:1)                                    | 510,4886                 | -                          |
| <b>PI-Cer identified as [M-H]<sup>-</sup></b> |                          |                            |
| PI-Cer(d18:1/14:0)                            | 750,4921                 | d18:1/14:0                 |
| PI-Cer(d18:1/14:1)                            | 748,4765                 | d18:1/14:1                 |

***Abbreviations:***

**PC**, phosphatidylcholine;

**PE**, phosphatidylethanolamine;

**PG**, phosphatidylglycerol;

**PI**, phosphatidylinositol;

**LPC**, lysophosphatidylcholine;

**LPE**, lysophosphatidylethanolamine;

**LPG**, lysophosphatidylglycerol;

**MGTS**, monoacylglyceryl 3-O-4'-(N,N,N-trimethyl) homoserine;

**DGTS**, diacylglyceryl 3-O-4'-(N,N,N-trimethyl) homoserine;

**SQDG**, sulfoquinovosyldiacylglycerol;

**MGDG**, monogalactosyldiacylglycerol;

**DGDG**, digalactosyldiacylglycerol;

**MGMG**, monogalactosylmonoacylglycerol;

**DGMG**, digalactosylmonoacylglycerol;

**Cer**, ceramide;

**PI-Cer**, inositolphosphoceramide.
